# Supplementary material for: Effect of relative humidity on the composition of secondary organic aerosol from the oxidation of toluene
Source: Copernicus journal article supplement (doi:10.5194/acp-18-1643-2018), 2018-02-06
Supplement: Supplementary file 1 [file acp-18-1643-2018-supplement.zip]

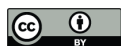

*Supplement of*

**Effect of relative humidity on the composition of secondary organic aerosol from the oxidation of toluene**

**Mallory L. Hinks et al.**

*Correspondence to:* Sergey A. Nizkorodov ([nizkorod@uci.edu](mailto:nizkorod@uci.edu))

- [acp-18-1643-2018-supplement-title-page.pdf](#)
- [SI\\_mass\\_spectra.txt](#)

The copyright of individual parts of the supplement might differ from the CC BY 4.0 License.
